# Supplementary material for: Casein Kinase 1 Underlies Temperature Compensation of Circadian Rhythms in Human Red Blood Cells
Source: PubMed Central journal article supplement — J Biol Rhythms. 2019 Mar 21;34(2):144–53. doi: 10.1177/0748730419836370 (PMC6458989; doi:10.1177/0748730419836370), 2019-03-21
Supplement: Supplementary_data.pdf [file Supplementary_data.pdf]

# Supplementary data

Casein kinase 1 underlies temperature compensation of circadian rhythms in human red blood cells

Andrew D. Beale<sup>1,3</sup>, Emily Kruchek<sup>1</sup>, Stephen J. Kitcatt<sup>1</sup>, Erin A. Henslee<sup>1</sup>, Jack S.W. Parry<sup>1</sup>, Gabriella Braun<sup>1</sup>, Rita Jabr<sup>2</sup>, Malcolm von Schantz<sup>2</sup>, John S. O'Neill<sup>\*3</sup>, Fatima H. Labeed<sup>\*1</sup>

<sup>1</sup> Faculty of Engineering and Physical Sciences, University of Surrey, Guildford, Surrey GU2 7XH, UK

<sup>2</sup> Faculty of Health and Medical Sciences, University of Surrey, Guildford, Surrey GU2 7XH, UK

<sup>3</sup> Medical Research Council Laboratory of Molecular Biology, Francis Crick Avenue, Cambridge. CB2 0QH, UK

-----

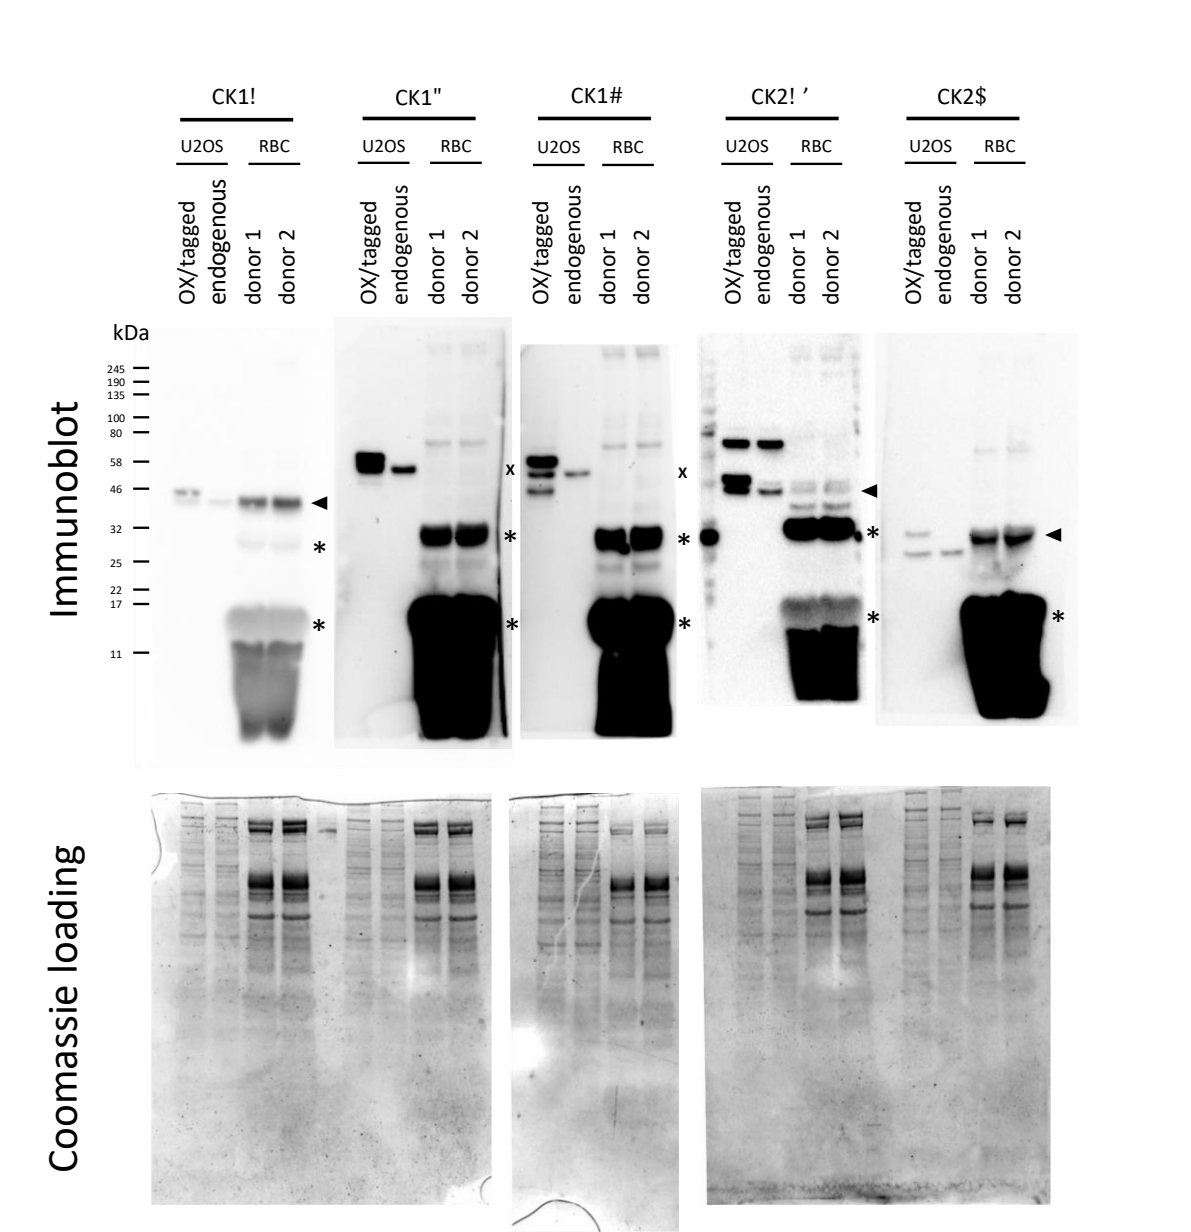

Supplementary Figure 1. Uncropped immunoblot scans from Figure 2.

Cut membranes from three different gels were probed with antibodies to the indicated kinase isoform. Lysates of RBCs from two different donors were loaded. Lysates from U2OS expressing a tagged indicated kinase isoform (V5-CK1 $\alpha$ , V5-CK1 $\delta$ , HA-CK1 $\epsilon$ , HA-CK2 $\alpha'$  and Myc-CK2 $\beta$ ) and untransfected U2OS cells served as controls. Membranes were exposed for different lengths of time for detection of signal. Over-exposed blots are shown for CK1 $\delta$  and CK1 $\epsilon$ . ◀ = specific band of interest. X = absence of band of interest. \* = non-specific band due to peroxidase activity of haemoglobin dimer (32kDa) and monomer (16kDa). A very faint band at 64kDa, corresponding to the haemoglobin tetramer, can be seen on some membranes.

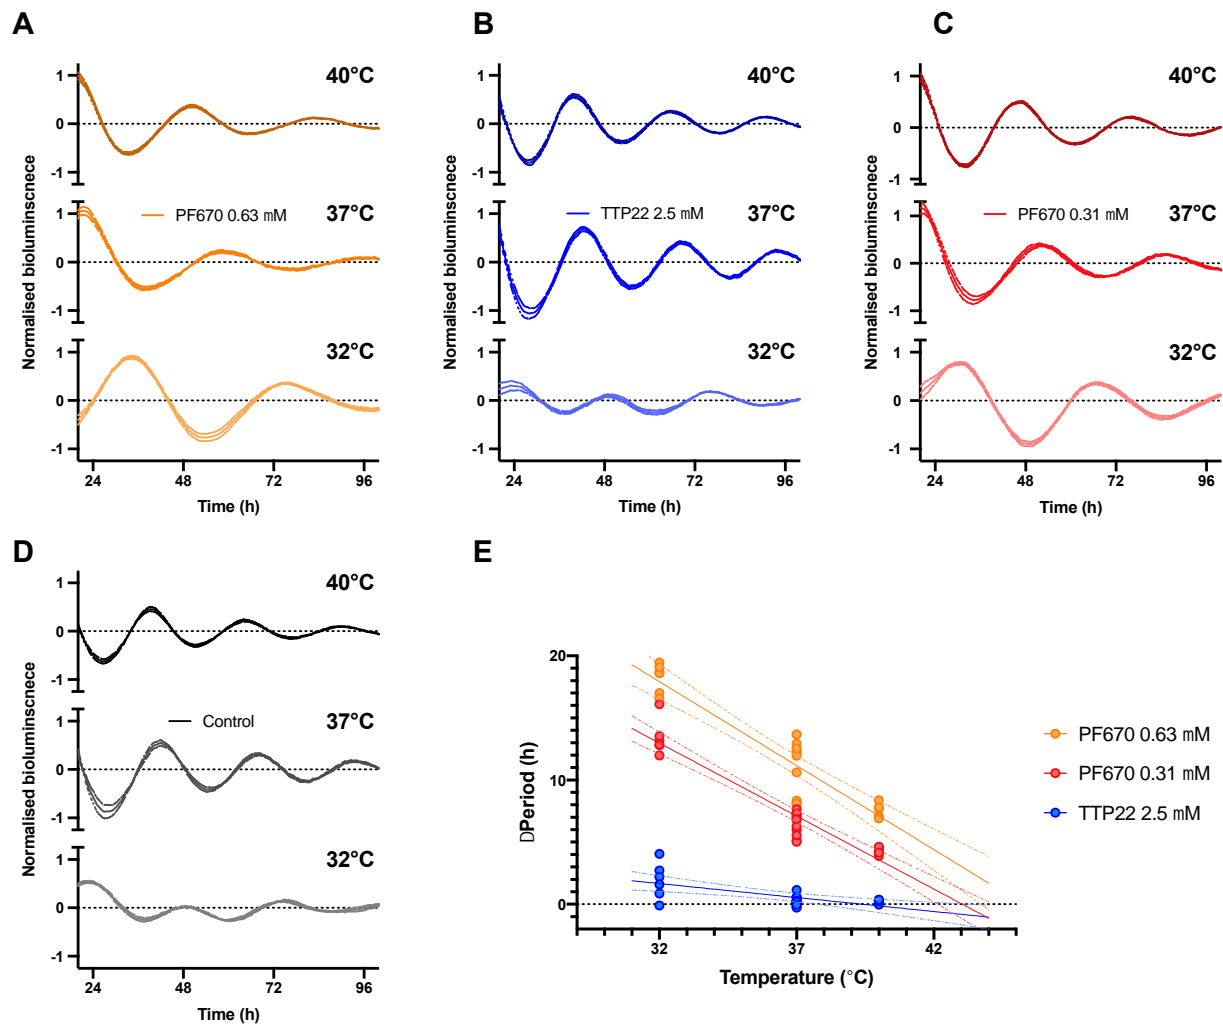

### Supplementary Figure 2. Effect of casein kinase inhibition is temperature dependent.

Human U2OS cells (*BMAL1:Luc*), synchronised by the change of medium at  $t=0$ , were cultured at constant 32 °C, 37 °C or 40°C for 4 days in the presence of 0.63  $\mu$ M PF-670462 (orange, A), 0.31  $\mu$ M PF-670462 (red, B) and 2.5  $\mu$ M TTP22 (blue, C) or vehicle (black, D). Raw data was detrended using a 24- or 30-h moving average for TTP22 or PF-670462 respectively, and period values derived from damped cosine curves fitting using non-linear regression as described previously. (E) Change in period relative to control is shown (mean  $\pm$  SEM,  $n = 6$  (for 32°C and 40°C) or 12 (for 37°C)). Straight lines were fitted to the data using linear regression in GraphPad Prism and extrapolated to 31°C and 44°C. 95% confidence bands for the straight line fit are shown as dotted lines.

| Kinase             | Inhibitor function (% remaining vs control)         |                                    |                                             | Presence in                                                              |                   |
|--------------------|-----------------------------------------------------|------------------------------------|---------------------------------------------|--------------------------------------------------------------------------|-------------------|
|                    | TTP22                                               | D4476                              | PF670                                       | RBCs                                                                     | U2OS <sup>1</sup> |
| CK1 $\alpha$       | n.d.                                                | n.d.                               | 4.4                                         | +                                                                        | +                 |
| CK1 $\alpha$ -like | n.d.                                                | n.d.                               | 0.9                                         | n.d.                                                                     | n.d.              |
| CK1 $\delta$       | n.d.                                                | 4                                  | 3.8                                         | -                                                                        | +                 |
| CK1 $\epsilon$     | n.d.                                                | n.d.                               | 0.1                                         | -                                                                        | +                 |
| CK2 $\alpha$       | 0.72 (CK2)                                          | 83 (CK2)                           | 53                                          | n.d.                                                                     | +                 |
| CK2 $\alpha'$      | n.d.                                                | n.d.                               | 33                                          | +                                                                        | +                 |
| CK2 $\beta$        | n/a                                                 | n/a                                | n/a                                         | +                                                                        | +                 |
| JNK3               | 104                                                 | 82                                 | 0                                           | -                                                                        | -                 |
| ROCK1              | 126                                                 | 105                                | 100                                         | +                                                                        | +                 |
| ROCK2              | n.d.                                                | n.d.                               | 100                                         | +                                                                        | +                 |
| ASK1/MAP3K5        | 92                                                  | n.d.                               | 100                                         | -                                                                        | -                 |
| AURKA/STK6         | 23                                                  | n.d.                               | 61                                          | -                                                                        | +                 |
| Reference          | Golub <i>et al.</i><br>(compound 6a,<br>10 $\mu$ M) | Bain <i>et al.</i><br>(10 $\mu$ M) | Bibian <i>et al.</i><br>(10 $\mu$ M KINOME) | Figure 2 this<br>manuscript; Beck <i>et al.</i> ;<br>Bryk and Wiśniewski |                   |

**Supplementary Table 1.** Data from literature on specificity of the inhibitors used in this study. n/a = not applicable (CK2 $\beta$  is a regulatory subunit and has no kinase activity). Where assays do not specify inhibition of a specific isoform of CK1 or CK2, data is given for the function of either CK2 or CK1 after treatment and listed in brackets. n.d. = no data.

#### Supplementary References

1. Beck, M. *et al.* The quantitative proteome of a human cell line. *Mol. Syst. Biol.* **7**, 1–8 (2011).
